# Supplementary material for: Effects of multifunctional cerium-doped carbon dots on photosynthetic capacity and nutritional quality of lettuce
Source: Royal Society of Chemistry journal article supplement (doi:10.1039/d4en00374h), 2024-01-01
Supplement: d4en00374h1.pdf [file d4en00374h1.pdf]

## Supporting Information

### **Effects of multifunctional cerium-doped carbon dots on photosynthetic capacity and nutritional quality of lettuce**

Shili Zhao,<sup>a</sup> Chen Li,<sup>a</sup> Caijuan Wu,<sup>b</sup> Juan Hu,<sup>c</sup> Zhiwei Zhang,<sup>a</sup> Bingfu Lei,<sup>\*ab</sup> Wei Li,<sup>a</sup> Chaofan Hu,<sup>a</sup> Yingliang Liu,<sup>a</sup> Mingtao Zheng<sup>\*ab</sup>

*Key Laboratory for Biobased Materials and Energy of Ministry of Education, College of Materials and Energy, South China Agricultural University, Guangzhou 510642, People's Republic of China.*

*E-mail: tleibf@scau.edu.cn. mtzheng@scau.edu.cn*

*Maoming Branch, Guangdong Laboratory for Lingnan Modern Agriculture, Maoming 525100, China*

*Gaozhou Shenli Agricultural Technology Co., Ltd., Maoming 525254, China*

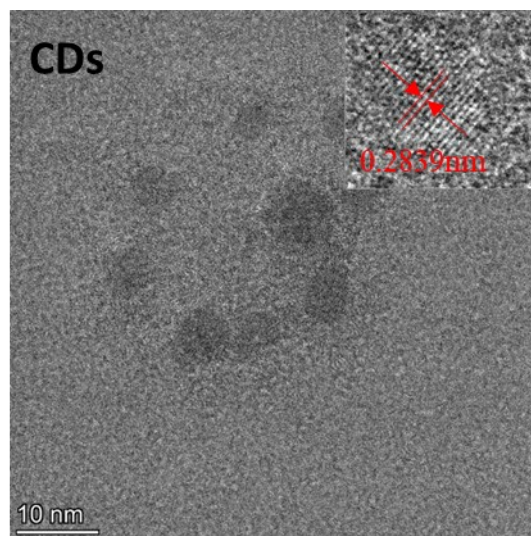

**Fig S1.** High-resolution transmission electron microscopy (HR-TEM) images of CDs with the accompanying: crystal spacing map.

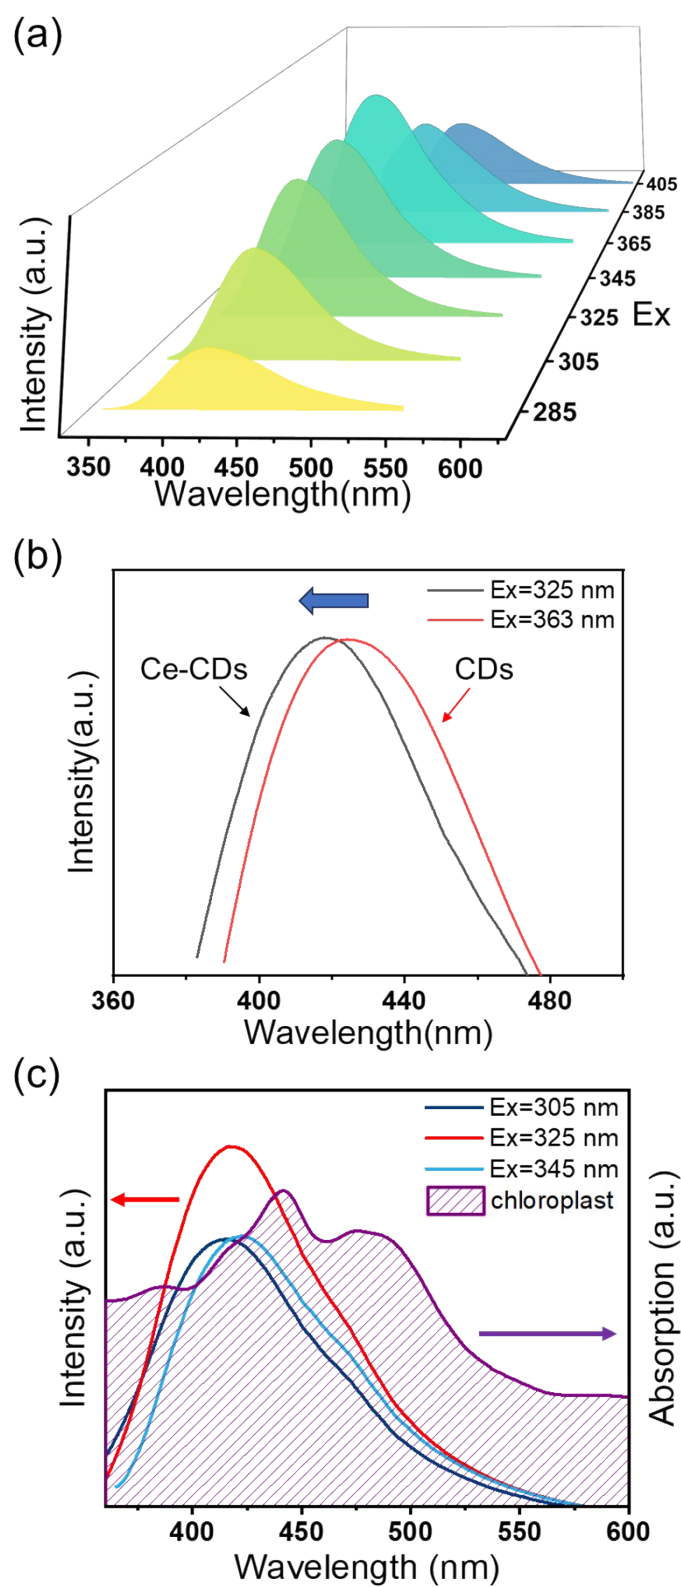

**Fig S2.** (a) Emission spectra of CDs with excitation wavelengths of 285 ~ 405 nm, (b) Optimal excitation spectra of Ce-CDs and CDs, (c) Excitation spectra of Ce-CDs at 305, 325 and 345 nm and UV-Vis absorption spectra of chloroplasts.

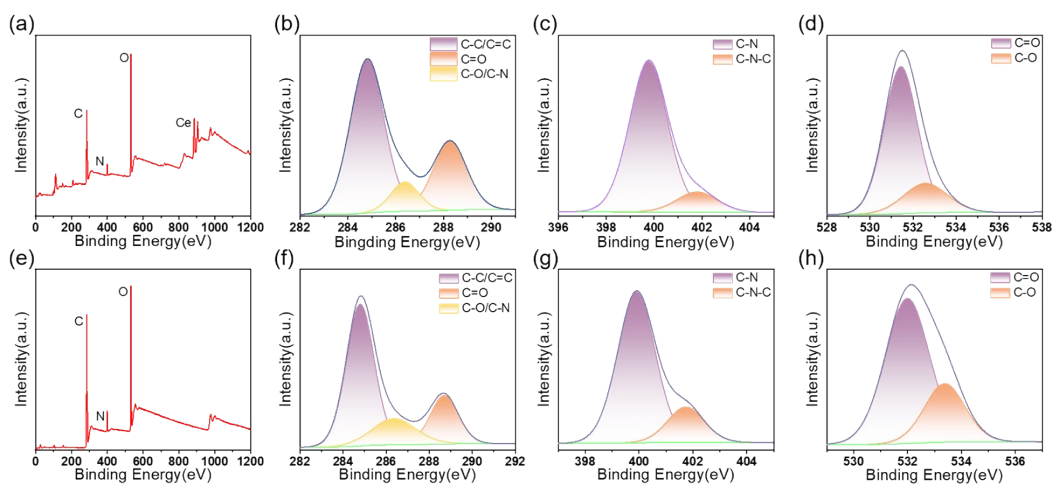

**Fig S3.** (a) Full-scanning XPS spectra of Ce-CDs; (b) C1s, (c) N1s, (d) O1s; (e) Full-scanning XPS spectra of CDs, (f) C1s, (g) N1s, (h) O1s.

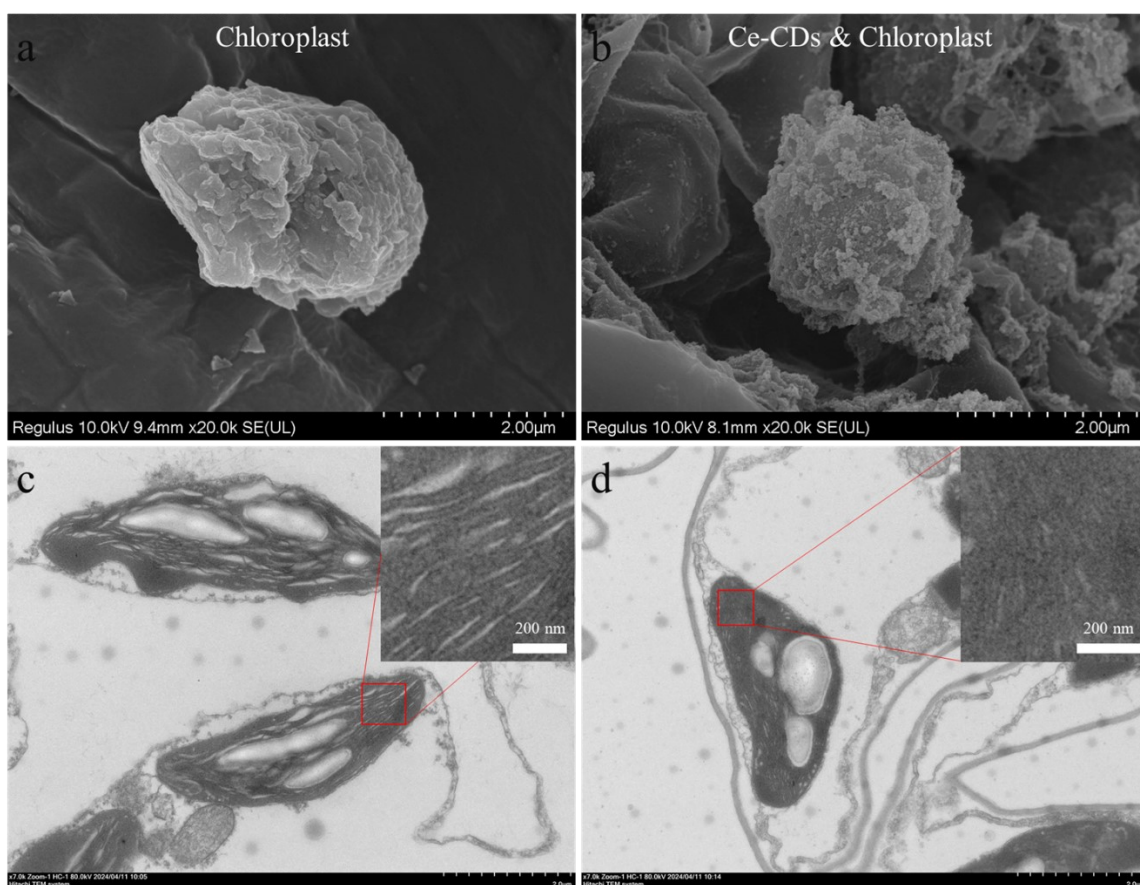

**Fig S4.** SEM (A and B) and TEM (C and D) images of chloroplasts alone and Ce-CDs& chloroplasts

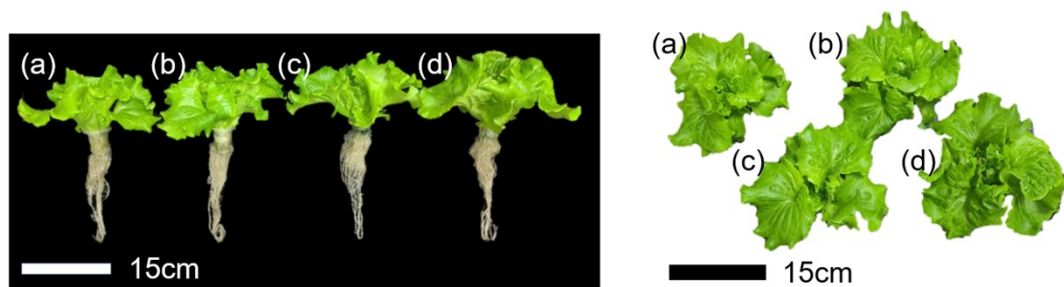

**Fig S5.** Lettuce with different treatments: (a) blank treatment group, (b) 100 mg L<sup>-1</sup>Ce treatment group, (c) 100 mg L<sup>-1</sup>CDs treatment group, (d) 100 mg L<sup>-1</sup>Ce-CDs treatment group.

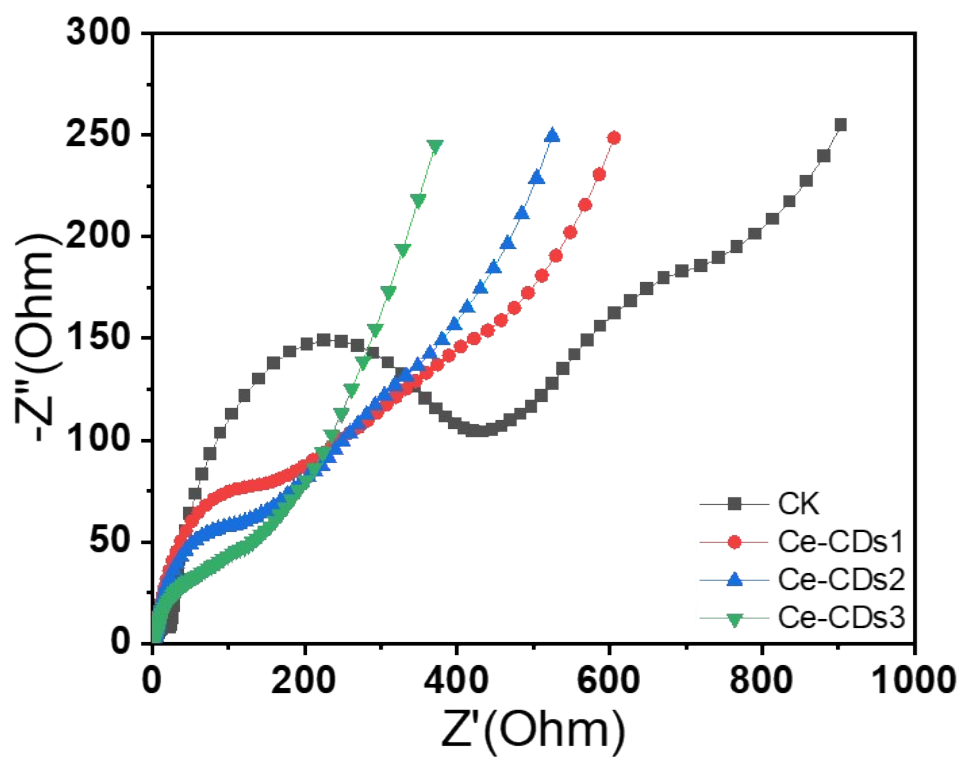

**Fig S6.** Impedance map of Ce-CDs.

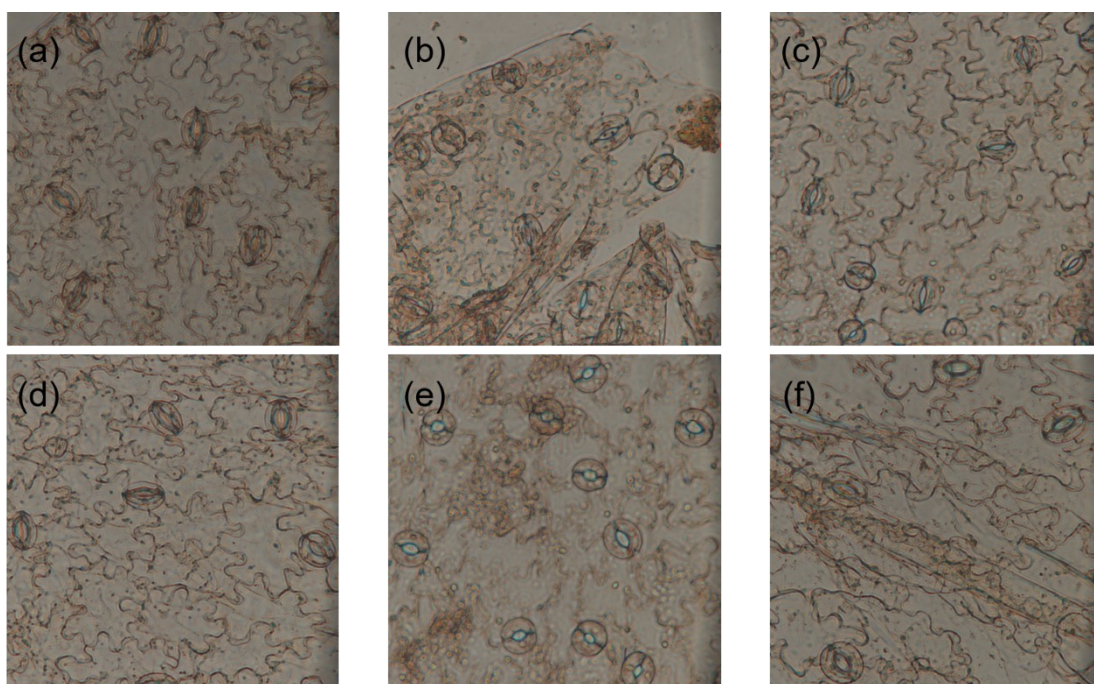

**Fig S7.** Stomatal images of different treatment groups (a) blank treatment group, (b) 100 mg L<sup>-1</sup>Ce treatment group, (c) 100 mg L<sup>-1</sup>CDs treatment group, (d) 50 mg L<sup>-1</sup>Ce-CDs treatment group, (e) 100 mg L<sup>-1</sup>Ce-CDs treatment group, (f) 150 mg L<sup>-1</sup>Ce-CDs treatment group.
